# Supplementary material for: Wheelchair service provision education in Canadian occupational therapy programs
Source: PubMed Central journal article supplement (PMC8853462; doi:10.1371/journal.pone.0262165), 2022-02-17
Supplement: pone.0262165.s001.pdf [file pone.0262165.s001.pdf]

# ENHANCING WHEELCHAIR EDUCATION IN CANADIAN OCCUPATIONAL THERAPY UNIVERSITY PROGRAMS

## **Objective 1: Sociodemographic Form**

1. What is your gender?

- Man
- Woman
- Non-binary
- Prefer not to answer

2. What is your age? \_\_\_\_\_

3. What is your primary language?

- English
- French
- Other: \_\_\_\_\_

4. What is your level of education? (please check all that apply)

- Diploma (OT)
- Bachelors (OT)
- Bachelors (other)
- Masters (OT)
- Masters (other)
- Masters (research-based)
- PhD

5. What is your position within the occupational therapy program?

- Full-time faculty member
- Part-time faculty member
- Adjunct Faculty
- Invited Presenter
- Other: \_\_\_\_\_

6. For how many years have you been a professor, clinical faculty, adjunct faculty or an invited presenter, in this occupational therapy program? \_\_\_\_\_

7. Do you currently practice clinically?

- No
- Yes

In what area of practice? \_\_\_\_\_

Does your current practice include wheelchair service provision?  Yes  No

8. What role(s) do you currently play in the delivery of wheelchair content in your program?  
(check all that apply)

- Coordinate a course that is exclusively wheelchair-specific
- Coordinate a course that includes wheelchair-specific content
- Teach within a course that is exclusively wheelchair-specific
- Teach wheelchair-specific content within a course
- Assist within a course that is exclusively wheelchair-specific
- Assist with wheelchair-specific content within a course
- Other wheelchair-relevant involvement (describe: \_\_\_\_\_ )

9. For how many years have you been teaching wheelchair content in the occupational therapy program? \_\_\_\_\_

10. Have you developed, or contributed to the development, of a wheelchair-specific course or module for use within the occupational therapy program?

- No
- Yes

11. Since completion of your clinical degree, have you taken additional courses specific to wheelchair service provision?

- No
- Yes (please check all that apply)
  - Continuing Education offered through a university program
  - Conference workshop
  - Educational opportunity offered by a private organization
  - Online course (ex: MOOC)
  - Self-study
  - Other: \_\_\_\_\_

12. Do you have an additional certification related to wheelchair service provision? (Ex: RESNA Seating and Mobility Specialist Certification, ISWP certification)

- No
- Yes (please specify certification) \_\_\_\_\_

13. Are you a member of an organization or community of practice that is wheelchair-related?

- No
- Yes
  - RESNA
  - ISWP
  - ISPO
  - Other (describe: \_\_\_\_\_ )
  - Other (describe: \_\_\_\_\_ )
